# Supplementary material
Source: publisher figshare collection journal article supplement (https://rs.figshare.com/ndownloader/files/10319322)
Supplement: Supplementary file 1 [file 10319322]

## Sheet: jh cooperation treatment data u
year	treatdom	alphaagr	betaagr
2013	jh	0	0
2013	jh	0.30103	0.477121
2013	jh	0	0
2013	jh	0	0
2013	jh	0	0
2013	jh	0	0
2013	jh	0.30103	0.477121
2013	jh	1.07918	0
2013	jh	0.60206	0
2013	jh	0.477121	0
2013	jh	0	0
2013	jh	0.477121	0
2013	sjh	0.69897	0.30103
2013	sjh	0.30103	0
2013	sjh	1.11394	0
2013	sjh	0.69897	0.477121
2013	sjh	0.30103	0.477121
2013	sjh	0.477121	0
2013	sjh	0.954243	0.60206
2013	sjh	0	0
2013	sjh	0.69897	0.477121
2013	sjh	0.60206	0
2013	nojh	0	0
2013	nojh	0	1
2013	nojh	0.69897	0.30103
2013	nojh	0.477121	0
2013	nojh	0	0.60206
2013	nojh	0.477121	0
2013	nojh	0.30103	0
2013	nojh	0.60206	0
2013	nojh	0.30103	0
2013	nojh	0	0
2013	nojh	1	0.30103
2013	nojh	0	0.60206
2013	nojh	0.477121	0
2013	nojh	1.07918	1.07918
2013	nojh	0.60206	0.30103
2013	nojh	0.60206	0.60206
2013	nojh	0	0
2013	nojh	0.30103	0
2013	jh	0	0
2015	jh	1.14613	0
2015	jh	0.778151	0
2015	jh	1.20412	0.477121
2015	jh	1.07918	0.845098
2015	jh	0	0.60206
2015	sjh	0.60206	0
2015	sjh	0.90309	0
2015	sjh	2.39794	1.82607
